# Supplementary material
Source: MDPI journal article supplement (https://www.mdpi.com/2073-4352/13/4/549)
Supplement: s1 [file s1]

# Effects of Solvent Vapor Atmosphere on Photovoltaic Performance of Perovskite Solar Cells

Miao He,<sup>1,§</sup> Shuyan Chen,<sup>1,§</sup> Taoran Wang,<sup>2</sup> Gu Xu,<sup>3</sup> Na Liu,<sup>1\*</sup> Fan Xu<sup>4,5\*</sup>

<sup>1</sup> Tsinghua-Berkeley Shenzhen Institute, Institute of Materials Science, Tsinghua Shenzhen International Graduate School, Tsinghua University, Shenzhen 518055, China

<sup>2</sup> Energy Materials and Optoelectronics Unit, Songshan Lake Materials Laboratory, China Academy of Sciences, Dongguan, Guangdong 523808, China

<sup>3</sup> Department of Materials Science and Engineering, McMaster University, 1280 Main St. W, Hamilton, ON L8S 4L8, Canada

<sup>4</sup> State Key Laboratory for Artificial Microstructure and Mesoscopic Physics, School of Physics, Frontiers Science Center for Nano-optoelectronics & Collaborative Innovation Center of Quantum Matter, Peking University, Beijing 100871, China

<sup>5</sup> Shenzhen BTR New Energy Technology Institute Co., Ltd, Shenzhen 518118, China

§ (M.H. and S.C.) These authors contributed equally to this work.

\* Corresponding authors: nanaliu\_nnl@163.com; xufan@pku.edu.cn

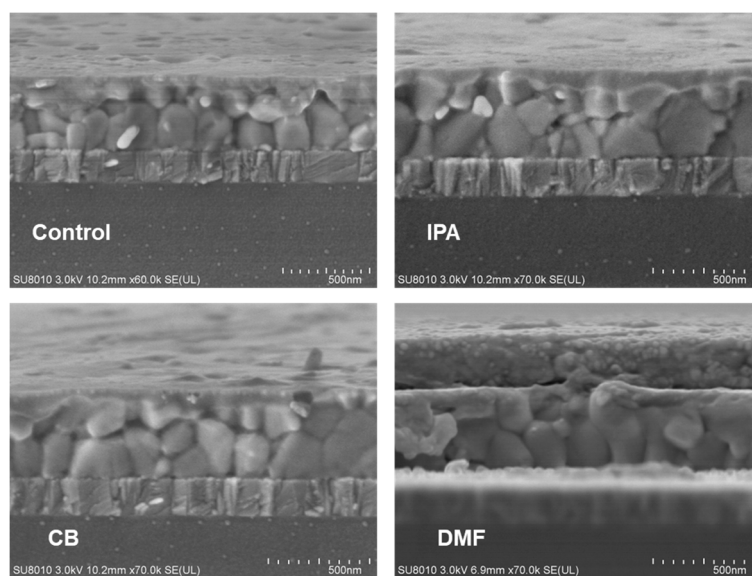

**Figure S1.** Cross-sectional SEM images of perovskites annealed under different atmospheres, with a scale bar of 500 nm.
